# Supplementary material
Source: MDPI journal article supplement (https://www.mdpi.com/2073-4441/8/3/95)
Supplement: s1 [file s1]

XXX Primary School in community A  
4<sup>th</sup> Grade Observations

| <b>4<sup>th</sup> Grade Observations: Monday July 27, 2015 (T1)</b> |                                                                                                                                                                                                                                                                                                                                                                                                    |
|---------------------------------------------------------------------|----------------------------------------------------------------------------------------------------------------------------------------------------------------------------------------------------------------------------------------------------------------------------------------------------------------------------------------------------------------------------------------------------|
| 0715                                                                | School starts, some morning “assembly” – lines of students outside each classroom                                                                                                                                                                                                                                                                                                                  |
| 0730                                                                | Observers sit down outside classrooms, teachers greet us<br>Students still filing into classes<br>Each grade has their own water container with spigot sitting on chair with bowl underneath<br>Some children were filling the containers with water from bucket with cup, added 1 cup of something (probably bleach)<br>Each grade also has one black bucket of water with lid and red cup on top |
| 0740                                                                | Grade 4A teacher arrives                                                                                                                                                                                                                                                                                                                                                                           |
| 0747                                                                | Female delivers metal plates (~20) to outside classroom<br>She also carries buckets and water containers back and forth to classrooms                                                                                                                                                                                                                                                              |
| 0753                                                                | She places 1 water container outside Grade 4A’s classroom                                                                                                                                                                                                                                                                                                                                          |
| 0800                                                                | Male walks past 7 <sup>th</sup> grade classrooms with bell<br>4 <sup>th</sup> Grade teacher walks from one classroom into other room                                                                                                                                                                                                                                                               |
| 0806                                                                | Teacher returns to classroom<br>Female delivers metal plates inside classroom, and takes buckets from outside                                                                                                                                                                                                                                                                                      |
| 0810                                                                | Same female delivers bucket outside classroom                                                                                                                                                                                                                                                                                                                                                      |
| 0824                                                                | 4 <sup>th</sup> Grade teacher speaks outside rom                                                                                                                                                                                                                                                                                                                                                   |
| 0828                                                                | 1 child runs out of class then runs back                                                                                                                                                                                                                                                                                                                                                           |
| 0840                                                                | Grade 4A teacher returns to classroom                                                                                                                                                                                                                                                                                                                                                              |
| 0842                                                                | Male walks to latrine (not in 4 <sup>th</sup> grade)                                                                                                                                                                                                                                                                                                                                               |
| 0847                                                                | Male teacher walks out again<br>Younger children (~30) all run to latrines with backpacks on                                                                                                                                                                                                                                                                                                       |
| 0850                                                                | Adult female delivers large bucket to one classroom<br>Children walk back from latrine, Grade 4A teacher returns                                                                                                                                                                                                                                                                                   |
| 0855                                                                | Another classroom runs to latrine                                                                                                                                                                                                                                                                                                                                                                  |
| 0858                                                                | Children run back to class from latrine                                                                                                                                                                                                                                                                                                                                                            |
| 0902                                                                | Grade 4A teacher stands outside classroom                                                                                                                                                                                                                                                                                                                                                          |
| 0931                                                                | Students walk to water containers to rinse hands (for about 10 to 15 seconds) one at a time with other students are waiting in line behind<br>Students dump the contents of the bowl from underneath the hand rinse container into the nearby plants then replace it underneath spigot<br>Grade 4A teacher stands outside classroom again                                                          |
| 0939                                                                | <b>Male drinks water from black bucket with cup</b><br>1 red cup/mug sits atop bucket lid, but male student brings different cup<br>Some students have snacks and lunchboxes                                                                                                                                                                                                                       |
| 0944                                                                | Male refills 1 hand washing jug at central spigot by (2) Jojo tanks<br>No soap observed                                                                                                                                                                                                                                                                                                            |

|      |                                                                                                                                                                                                                                        |
|------|----------------------------------------------------------------------------------------------------------------------------------------------------------------------------------------------------------------------------------------|
|      | Students are eating chips and pre-packaged snacks from bright-colored packages                                                                                                                                                         |
| 0947 | Waiting line for hand rinse decreases in length<br>Some students are slowly returning to classrooms<br>Some students are walking around with the silver plates                                                                         |
| 0951 | Grade 4A teacher walks out with bread and other items                                                                                                                                                                                  |
| 0957 | 2 children drink from black bucket with the communal cup                                                                                                                                                                               |
| 1000 | Screeching bells signals end of recess<br>6 students drink 1-2 cups each<br>4 <sup>th</sup> graders switch classrooms                                                                                                                  |
| 1007 | Women collect bucket with used plates from just inside the 4 <sup>th</sup> grade rooms                                                                                                                                                 |
| 1010 | All children are back inside classrooms                                                                                                                                                                                                |
| 1016 | Grade 4B teacher leaves classroom to fill the spigoted water container with water from the black drinking bucket, leaves empty bucket outside classroom<br>2 students take bucket to fill at central spigot, replace outside classroom |
| 1021 | Boys pour out hand rinse receiving bowl<br>Teacher replaces cup on top of bucket lid<br>All return to classroom<br>Women wash cups at central spigot                                                                                   |
| 1114 | 1 student enters classroom, another exits                                                                                                                                                                                              |
| 1117 | ~10 other students run to latrine (not 4 <sup>th</sup> grade)                                                                                                                                                                          |
| 1122 | Some of students at latrine return                                                                                                                                                                                                     |
| 1132 | 1 male student leaves classroom for latrine                                                                                                                                                                                            |
| 1136 | 1 male students runs to latrine                                                                                                                                                                                                        |
| 1137 | 1 male returns and rinses hands at water container with spigot                                                                                                                                                                         |
| 1141 | 1 child rinses hands and drinks water with cup, 1 female drinks water with cup<br>Teacher walks outside to barrels with personal mug                                                                                                   |
| 1143 | 1 female drinks from bucket with cup<br>The drinking water buckets are partially covered with lid<br>1 female pours out water tray from drinking water<br>1 male drinks water with mug                                                 |
| 1148 | 1 male rinses hands<br>1 female drinks water with mug<br>1 female leaves for restroom                                                                                                                                                  |
| 1211 | 1 male rinses hands at water container with spigot<br>Grade 4B teacher walks around outside                                                                                                                                            |
| 1222 | 1 female rinses hands outside classroom then drinks using communal cup                                                                                                                                                                 |
| 1234 | 4 <sup>th</sup> grade students exit classrooms and switch<br>1 male drinks with mug, 2 females also drink with same mug                                                                                                                |
| 1236 | 1 female drinks with same mug<br>All students done switching classrooms                                                                                                                                                                |
| 1240 | 1 female walked in from latrine but did not wash hands<br>Observers leave school                                                                                                                                                       |

| <b>4<sup>th</sup> Grade Observations: Thursday July 23, 2015 (T1)</b> |                                                                                                                                                                                                                                                   |
|-----------------------------------------------------------------------|---------------------------------------------------------------------------------------------------------------------------------------------------------------------------------------------------------------------------------------------------|
| 1002                                                                  | Observers arrive<br>Children returning to classrooms after snack<br>Line waiting to rinse hands outside classroom<br>1 male drinks water with communal mug                                                                                        |
| 1004                                                                  | Some children still returning plates to stack inside classroom<br>1 female puts plates stack outside door<br>She and 1 male use communal mug to drink from bucket                                                                                 |
| 1007                                                                  | 1 female dumps full water rinse tray into nearby bush<br>Was almost empty                                                                                                                                                                         |
| 1008                                                                  | All students currently in classrooms                                                                                                                                                                                                              |
| 1010                                                                  | Grade 4A teacher stands outside classroom speaking to children then walks towards main office                                                                                                                                                     |
| 1011                                                                  | 2 females collect bin with plates and half-empty box of milk cartons<br>Grade 4A teacher returns to classroom<br>There are mostly empty boxes of milk cartons outside most classes<br>There are 5 red mugs lined up inside windowsill of Grade 4B |
| 1051                                                                  | 1 male goes to latrine                                                                                                                                                                                                                            |
| 1055                                                                  | 1 male returns from latrine, not sure if he rinses hands (Mulalo says he rinsed hands)<br>1 female goes to latrine<br>Many students not wearing shoes                                                                                             |
| 1104                                                                  | 2 males from 4B drink 1 cup, both use their own mugs they bring with them<br>Grade 4B teacher returns                                                                                                                                             |
| 1109                                                                  | Classrooms switch                                                                                                                                                                                                                                 |
| 1111                                                                  | All students are back in classrooms                                                                                                                                                                                                               |
| 1135                                                                  | 1 female rinses hands outside 4A                                                                                                                                                                                                                  |
| 1141                                                                  | Grade 4A teachers leave class                                                                                                                                                                                                                     |
| 1142                                                                  | 1 female from 4B goes to latrine                                                                                                                                                                                                                  |
| 1143                                                                  | Grade 4A teacher returns to class                                                                                                                                                                                                                 |
| 1145                                                                  | 1 female from 4B rinses hands and returns to class                                                                                                                                                                                                |
| 1155                                                                  | Grade 4B teacher leaves class                                                                                                                                                                                                                     |
| 1156                                                                  | 1 female from 4B drinks water from bucket and takes the cup to class                                                                                                                                                                              |
| 1204                                                                  | 2 males from 4A leave class to latrine<br>4A teacher outside class talking to principal                                                                                                                                                           |
| 1205                                                                  | 4B teacher returns to class                                                                                                                                                                                                                       |
| 1207                                                                  | 2 males from 4B return from latrine and want to rinse hands but the water has run out, they go to fill up the water container                                                                                                                     |
| 1210                                                                  | 1 male from 4B leaves to latrine<br>1 male returns with a full water container and returns to class                                                                                                                                               |
| 1212                                                                  | 1 female goes into class to talk to the teacher (not sure if she is a teacher)                                                                                                                                                                    |
| 1213                                                                  | 1 female and 1 male from 4B rinse hands and go back to class<br>Cups used to drink water are lined up by the window inside classroom                                                                                                              |
| 1219                                                                  | 1 female from 4A rinses hands and goes to class                                                                                                                                                                                                   |

|      |                                                                                                                                            |
|------|--------------------------------------------------------------------------------------------------------------------------------------------|
| 1224 | 1 female from 4B leaves classroom to the staff room                                                                                        |
| 1226 | 1 female from 4B returns to class<br>1 female from 4A rinses hands and goes to class                                                       |
| 1237 | 1 female from 4A leaves class to the latrine<br>4B teacher leaves class                                                                    |
| 1239 | 1 male from 4B returns to class from latrine (not sure if he rinsed hands)<br>1 male from 4A leaves class to the latrine                   |
| 1240 | 1 male from 4A goes to 4B<br>2 females from 4A rinse hands from latrine                                                                    |
| 1241 | 1 female rinses hands and goes back to 4B<br>1 males goes to latrine                                                                       |
| 1242 | 4B teacher leaves class                                                                                                                    |
| 1243 | 1 male rinses hands and goes to class<br>1 male leaves class to latrine                                                                    |
| 1245 | 1 male rinses hands and goes back to class                                                                                                 |
| 1246 | 1 male leaves to the latrine                                                                                                               |
| 1248 | 2 males return from latrine and rinse hands, go to class (4B)                                                                              |
| 1257 | 4A teacher leaves class                                                                                                                    |
| 1258 | 4A teacher returns to class                                                                                                                |
| 1308 | 4 <sup>th</sup> grade teachers to meet with Natasha and Mulalo                                                                             |
| 1310 | Male student washes hands after returning from latrine using spigot                                                                        |
| 1313 | 2 students (M and F) go to latrine                                                                                                         |
| 1314 | Teacher exits for meeting<br>~10 students exit classroom and run around back                                                               |
| 1315 | 3 male students rinse hands after returning from latrine; they struggle with spigot                                                        |
| 1317 | 2 male students return from latrine and rinse hands, they also struggle to operate spigot                                                  |
| 1319 | Boys fighting for water at the spigot<br>2 girls wash hands after returning from restroom                                                  |
| 1320 | Kids gather around spigot<br>Kids standing in the door screaming                                                                           |
| 1321 | Kids running back and forth from classroom to yard                                                                                         |
| 1322 | Girl washing hands                                                                                                                         |
| 1323 | A bunch of girls gathering around spigot, all washing hands – some seem like just for fun?                                                 |
| 1325 | All order has been lost in this classroom                                                                                                  |
| 1330 | School is out                                                                                                                              |
| 1335 | 1 female drinks water from bucket                                                                                                          |
| 1339 | 1 female uses rest of water to rinse hands with spigot bucket, has to tip the container all the way over, places hands on bottom of spigot |
| 1342 | Observers leave school, water buckets appear to be left outside the classrooms overnight                                                   |

| <b>4<sup>th</sup> Grade Observations: Monday July 27, 2015 (T1)</b> |                                                                                                                                                                                                                                               |
|---------------------------------------------------------------------|-----------------------------------------------------------------------------------------------------------------------------------------------------------------------------------------------------------------------------------------------|
|                                                                     | All in one class, both 4 <sup>th</sup> grade classes<br>The learners were sent to fetch textbooks from the next class from Grade 4B<br>One learner (girl) went out and came from back with a pencil case                                      |
| 1030                                                                | Bell rang/clock for changing classes. 4 <sup>th</sup> grade did not change classes                                                                                                                                                            |
| 1043                                                                | Jerrycan is almost empty                                                                                                                                                                                                                      |
| 1105                                                                | Drinking water buckets for Grade 4A is almost empty since 1014, no                                                                                                                                                                            |
| 1115                                                                | Female left class to the bathroom, came back and washed hands from spigot                                                                                                                                                                     |
| 1155                                                                | Female, two of them took back the textbooks to Grade 4B (3 girls)<br>accompanied by the teacher went back to 4A with more textbooks on a different subject                                                                                    |
| 1200                                                                | Bell rings                                                                                                                                                                                                                                    |
| 1207                                                                | Grade 1 female learner went to report something to the Grade 4A teacher then left the class                                                                                                                                                   |
| 1220                                                                | Male left to go to the bathroom, came back and washed his hands                                                                                                                                                                               |
| 1227                                                                | Male went to the bathroom, came back and washed his hands                                                                                                                                                                                     |
| 1233                                                                | Male bathroom, came back and washed his hands                                                                                                                                                                                                 |
| 1242                                                                | Female, bathroom came back 10 minutes later and washed hands                                                                                                                                                                                  |
| 1254                                                                | Another teacher entered the classroom Grade 4A                                                                                                                                                                                                |
| 1300                                                                | Bell rings                                                                                                                                                                                                                                    |
| 1303                                                                | Both teachers leave the classroom                                                                                                                                                                                                             |
| 1312                                                                | A female younger student went to the Grade 4A class and spoke with a Grade 4A learner who came out of the class in the teacher's absence                                                                                                      |
| 1313                                                                | Male x3 went to the latrine, washed hands, jerrycan practically empty                                                                                                                                                                         |
| 1314                                                                | A male younger learner went to fourth grade to speak to an older boy also in the absence of a teacher                                                                                                                                         |
| 1315                                                                | Male goes to the bathroom, absence of                                                                                                                                                                                                         |
| 1316                                                                | Male x3 bathroom washed hands not proper due to almost empty jerrycan<br>Male went out until the jerrycan then turned back<br>Male x2 bathroom didn't properly wash hands due to emp<br>Male bathroom washed from the buckets, jerrycan empty |
| 1320                                                                | Teacher comes back to class (one teacher)                                                                                                                                                                                                     |
| 1323                                                                | Male bathroom washed hands                                                                                                                                                                                                                    |
| 1323                                                                | Female x2 took back the textbooks to grade 4B<br>Male bathroom washed hands<br>Female bathroom washed hands                                                                                                                                   |
| 1324                                                                | Female took books back to Grade 4B<br>Female bathroom washed hands                                                                                                                                                                            |
| 1329                                                                | Both 4 <sup>th</sup> Grade learners have been in one class all day                                                                                                                                                                            |
| 1330                                                                | Bell goes off to end today's school day                                                                                                                                                                                                       |
| 1335                                                                | Teacher went outside to speak on the phone                                                                                                                                                                                                    |
| 1337                                                                | Female went to the bathroom, didn't wash hands                                                                                                                                                                                                |
| 1340                                                                | Teacher back in class                                                                                                                                                                                                                         |

|      |                                                                                                                                                                                                                                                                                                                                                                                                         |
|------|---------------------------------------------------------------------------------------------------------------------------------------------------------------------------------------------------------------------------------------------------------------------------------------------------------------------------------------------------------------------------------------------------------|
|      | Teacher takes exercise books to the Grade 4B classroom and speaks to the guy that takes care of the garden                                                                                                                                                                                                                                                                                              |
| 1343 | Teacher is back in class                                                                                                                                                                                                                                                                                                                                                                                |
| 1345 | <p>All learners leave the class</p> <p>Female drinks water</p> <p>Male drinks water</p> <p>Female drinks water x2 cups</p> <p>Female drinks water</p> <p>Female drinks water x2 cups</p> <p>Female drinks water</p> <p>Male drinks water</p> <p>Male x4 move desks from 4A to 4B plus four more males</p> <p>Female x2 sweep 4B plus two males</p> <p>Female drinks water</p> <p>Female x4 sweep 4A</p> |

| <b>4<sup>th</sup> Grade Observations: Tuesday July 28, 2015 (T2)</b> |                                                                                                                                                                                                             |
|----------------------------------------------------------------------|-------------------------------------------------------------------------------------------------------------------------------------------------------------------------------------------------------------|
| 0800                                                                 | Arrive at school                                                                                                                                                                                            |
| 0808                                                                 | 2 males leave 4A classroom                                                                                                                                                                                  |
| 0811                                                                 | 1 male returns to 4A from bathroom and rinses hands                                                                                                                                                         |
| 0830                                                                 | <p>Group of learners leaves class (4B)</p> <p>1 male returns to class</p> <p>Group returns to class</p>                                                                                                     |
| 0850                                                                 | Food was taken to each of the classes                                                                                                                                                                       |
| 0855                                                                 | 2 males return to 4A class from the bathroom and rinse hands                                                                                                                                                |
| 0910                                                                 | <p>1 female from 4B returns from bathroom and rinses hands</p> <p>2 males from 4A drink water from the untreated bucket</p>                                                                                 |
| 0912                                                                 | 2 males from 4A drink treated water by opening bucket to scoop cup                                                                                                                                          |
| 0913                                                                 | <p>1 male from 4B drinks water (not sure which bucket) and takes cup to class</p> <p>1 male from 4B drinks water from the treated water bucket using spigot</p>                                             |
| 0920                                                                 | <p>1 male from 4A, 2 females from 4B drink from the MadiDrop buckets</p> <p>1 female from 4B drinks from the MadiDrop bucket</p>                                                                            |
| 0921                                                                 | <p>Soap was added in the jerrycans</p> <p>1 male from 4B drinks from the MadiDrop bucket</p> <p>1 male from 4A drinks from the MadiDrop bucket</p> <p>1 female from 4A drinks from the untreated bucket</p> |
| 0925                                                                 | 2 males from 4B each with a different cup drinks from the MadiDrop bucket                                                                                                                                   |
| 0926                                                                 | <p>3 males from 4B drink from the MadiDrop bucket</p> <p>1 male returns from bathroom, rinses hands, and goes to class</p>                                                                                  |
| 0927                                                                 | 3 males from 4B drink from the MadiDrop bucket                                                                                                                                                              |
| 0929                                                                 | 2 males from 4A rinse hands and go to class                                                                                                                                                                 |
| 0930                                                                 | <p>1 male from 4A drinks from the MadiDrop bucket</p> <p>Snack time</p>                                                                                                                                     |
| 0931                                                                 | <p>1 male from 4A drinks from MadiDrop bucket</p> <p>All the learners leave the class and go to wash hands, return to class</p>                                                                             |

|      |                                                                                                                                                     |
|------|-----------------------------------------------------------------------------------------------------------------------------------------------------|
| 0935 | A group of learners formed a line to go and drink water from the MadiDrop bucket                                                                    |
| 0936 | 3 females from 4A drink from the MadiDrop bucket<br>2 males from 4B drink from the MadiDrop bucket                                                  |
| 0938 | 5 males from 4B drink from the MadiDrop                                                                                                             |
| 0940 | 1 male and 1 female from 4B drink from the MadiDrop bucket                                                                                          |
| 0944 | Students are coming out one by one to rinse hands after eating                                                                                      |
| 0945 | A few learners are drinking from the MadiDrop bucket                                                                                                |
| 0953 | Jerrycan is empty                                                                                                                                   |
| 0955 | Jerrycan is refilled                                                                                                                                |
| 1000 | Students goes back to class, some still washing hands and after are drinking from the MadiDrops buckets                                             |
| 1002 | 3 males open bucket with MadiDrop but uses the spigot to fetch water                                                                                |
| 1005 | 4A bucket with MadiDrop is empty (samples collected)                                                                                                |
| 1010 | Female comes back from bathroom and washes her hands<br>MadiDrop bucket was filled with water (4A)                                                  |
| 1057 | 2 males from 4B drink water from the MadiDrop bucket<br>1 female from 4B drinks water from the MadiDrop bucket (takes cup to class)                 |
| 1100 | 1 female from 4B returns to class<br>1 male from 4A leaves class to the bathroom<br>4A goes to 4B (4A and 4B exchange classes)                      |
| 1111 | 1 female from 4B returns from the bathroom and rinses hands<br>1 female from 4B drinks water from the MadiDrop bucket and returns to class with cup |
| 1118 | 1 male from 4B leaves class to the bathroom<br>1 male from 4B returns from bathroom and rinses hands                                                |
| 1137 | 1 males leaves class                                                                                                                                |
| 1143 | Teachers check the buckets with MadiDrops if they still have water and she sends 2 males from 4B to refill MadiDrops buckets                        |
| 1220 | 1 male leaves 4B class and teacher leaves class                                                                                                     |
| 1225 | Male returns from toilet and washes hands<br>Teacher goes back to class                                                                             |
| 1240 | 1 male returns to from bathroom and washes hands                                                                                                    |
| 1246 | 1 female from 4A drinks from the MadiDrop bucket and takes cup to class                                                                             |
| 1308 | 1 female returns to class from bathroom and washes hands<br>Jerrycan is almost empty                                                                |
| 1314 | 1 male from 4A drinks water from the MadiDrop bucket                                                                                                |
| 1317 | Buckets with MadiDrops were emptied                                                                                                                 |
| 1330 | School out                                                                                                                                          |

| 4 <sup>th</sup> Grade Observations: Wednesday July 29, 2015 (T2) |                                                                                                             |
|------------------------------------------------------------------|-------------------------------------------------------------------------------------------------------------|
| 0933                                                             | Arrive<br>Students released from 4 <sup>th</sup> graders for snack break<br>20+ students rinse hands at jug |

|      |                                                                                                                                                                                                                                                                                                                       |
|------|-----------------------------------------------------------------------------------------------------------------------------------------------------------------------------------------------------------------------------------------------------------------------------------------------------------------------|
|      | Males drink 4A MadiDrop water                                                                                                                                                                                                                                                                                         |
| 0935 | 1 female drinks 2 cups 4B MadiDrop water<br>1 girl drinks 1 cup 4B treated water                                                                                                                                                                                                                                      |
| 0937 | 1 boy drinks 4B treated water 1 cup<br>1 boy drinks 4A treated water 1 cup<br>1 girl drinks 4A treated water 1 cup<br>1 boy drinks 4B treated water 1 cup<br>1 boy drinks 4B treated water 1 cup                                                                                                                      |
| 0939 | 2 girls drink 4B treated water 1 cup each<br>2 boys drink 4B treated water 1 cup each<br>1 boy brings cup inside, other cup (red) stays outside                                                                                                                                                                       |
| 0941 | Children walk outside with silver plates<br>1 girls drinks 4A treated water<br>Some children still rinsing hands<br>2 boys drink from 4A and 4B 1 cup each of treated water<br>1 boy from 4A fill cups then pours it outside classroom<br>1 girl drinks 4B treated water 1 cup<br>1 boy drinks 4B treated water 1 cup |
| 0944 | 2 girls drink 4A treated water 1 cup each<br>1 girl looks inside untreated water bucket                                                                                                                                                                                                                               |
| 0945 | 2 girls drink 4A treated water 1 cup each<br>1 boy drinks 4A treated water                                                                                                                                                                                                                                            |
| 0947 | 1 boy drinks 4B treated water 1 cup<br>1 boy takes water from 4A untreated to fill personal water bottle                                                                                                                                                                                                              |
| 0950 | 1 girl drinks 1 cup treated 4B water                                                                                                                                                                                                                                                                                  |
| 0955 | 1 girl drinks 1 cup treated 4B water                                                                                                                                                                                                                                                                                  |
| 0956 | 1 boy drinks 4A treated water 1 cup<br>1 boy drinks 4B treated water 1 cup<br>1 girl drinks 4B treated water 1 cup<br>2 boys drink 4B treated water 1 cup<br>1 boy sharing cheetos right next to water buckets                                                                                                        |
| 0958 | 1 boy drinks 1 cup treated 4A water                                                                                                                                                                                                                                                                                   |
| 1000 | Bell rings, children bring plates to bucket outside room 4B<br>2 girls and 1 boy drink 1 cup treated 4B water<br>3 boys and 1 girl drink treated 4A water, 3 more kids also come to drink<br>1 boy drinks 1 cup treated 4B water                                                                                      |
| 1003 | 4 <sup>th</sup> graders switch rooms<br>~6 kids drinking at 4A and 4B treated buckets, too much happening at once to count how many                                                                                                                                                                                   |
| 1041 | 1 girl from 4A goes to latrine                                                                                                                                                                                                                                                                                        |
| 1051 | Collected water samples                                                                                                                                                                                                                                                                                               |
| 1118 | Girl returns to 4B with cup                                                                                                                                                                                                                                                                                           |
| 1159 | 1 boy leaves for latrine                                                                                                                                                                                                                                                                                              |
| 1202 | Girl returns to 4B                                                                                                                                                                                                                                                                                                    |
| 1230 | 2 boys rinse hands                                                                                                                                                                                                                                                                                                    |
| 1231 | 1 boy drinks untreated water 1 cup                                                                                                                                                                                                                                                                                    |



|      |                                                                                                                                                  |
|------|--------------------------------------------------------------------------------------------------------------------------------------------------|
|      | Other children drinking water but not visible from where<br>1 boy drinks 1 cup treated 4A water<br>1 boy lifts lid of 4A treated bucket to drink |
| 1237 | 1 boy drinks treated 4B water 1 cup                                                                                                              |
| 1308 | 1 girl rinses hands                                                                                                                              |
| 1312 | 1 boy rinses hands                                                                                                                               |

| 4 <sup>th</sup> Grade Observations: Friday July 31, 2015 (T2) |                                                                                                                                                                                                                                                                              |
|---------------------------------------------------------------|------------------------------------------------------------------------------------------------------------------------------------------------------------------------------------------------------------------------------------------------------------------------------|
| 1000                                                          | Arrived at school                                                                                                                                                                                                                                                            |
| 1020                                                          | Teachers leaves Grade 4A to sit right outside the classroom, stands from time to time by the window to observe what happening in the classroom                                                                                                                               |
| 1030                                                          | Bell rings                                                                                                                                                                                                                                                                   |
| 1037                                                          | Teacher goes back to class and one learner (M) fetches his chair outside                                                                                                                                                                                                     |
| 1040                                                          | Grade 4A learners move to Grade 4B and Grade 4B learners move to Grade 4A<br>Male learner drinks water<br>Female learner drinks water<br>Female learner drinks water<br>Male learner drinks water<br>Female goes to bathroom, came back, washed hands and drink cup of water |
| 1059                                                          | Male x4 goes to the bathroom<br>Male drinks water then goes to bathroom<br>One boy came back from bathroom but didn't wash hands<br>Female goes to bathroom then goes into Grade 4B                                                                                          |
| 1100                                                          | Bell rings, teachers in both 4A and 4B leave their classes                                                                                                                                                                                                                   |
| 1105                                                          | One of the boys comes back to class and washes hands<br>Male drinks water                                                                                                                                                                                                    |
| 1110                                                          | Female x3 go to the bathroom<br>Male goes out of class to wash his hands then goes back to class                                                                                                                                                                             |
| 1115                                                          | Female goes to the bathroom<br>Two of the 3 girls come back from bathroom and wash their hands and one also drinks water                                                                                                                                                     |
| 1122                                                          | 2 girls and 1 boy come back from bathroom and drink from 4A treated water<br>1 girl rinses hands                                                                                                                                                                             |
| 1124                                                          | 1 boy drinks water 2 cups from 4A treated then returns to class<br>1 boy rinses hands                                                                                                                                                                                        |
| 1130                                                          | 3 boys rinse hands<br>1 boy drinks 4A treated water 4 cups                                                                                                                                                                                                                   |
| 1133                                                          | 3 boys leave 4A classroom for latrine                                                                                                                                                                                                                                        |
| 1135                                                          | They return and rinse hands                                                                                                                                                                                                                                                  |
| 1148                                                          | 3 boys return to 4A                                                                                                                                                                                                                                                          |
| 1149                                                          | About 5 students switch to 4B from 4A<br>2 more girls switch                                                                                                                                                                                                                 |
| 1153                                                          | 2 boys return (1 to 4A, 1 to 4B)                                                                                                                                                                                                                                             |
| 1159                                                          | 4 students switch to 4A                                                                                                                                                                                                                                                      |

|      |                                                                                                                                             |
|------|---------------------------------------------------------------------------------------------------------------------------------------------|
| 1207 | Many students walking between classrooms<br>Other students out for the day, need to clean rooms<br>4B teacher standing outside near buckets |
| 1212 | 2 boys sitting outside 4A classroom                                                                                                         |
| 1214 | 1 girl drinks from 4B treated water, many cups<br>1 boy drinks from 4A treated water                                                        |
| 1220 | Teacher 4B walks outside to explain broken bucket                                                                                           |
| 1225 | Learners begin to clean                                                                                                                     |
| 1227 | Male drinks from the bucket without the MadiDrop while MadiDrop bucket was being filled                                                     |

| 4 <sup>th</sup> Grade Observations: Tuesday August 4, 2015 (T3) |                                                                                                                                                                                           |
|-----------------------------------------------------------------|-------------------------------------------------------------------------------------------------------------------------------------------------------------------------------------------|
| 0942                                                            | Arrive, kids on snack break                                                                                                                                                               |
| 0943                                                            | 1 boy washes hands, kids are moving in/out of classrooms                                                                                                                                  |
| 0946                                                            | 4 boys drink 4A treated water, 1 cup each                                                                                                                                                 |
| 0947                                                            | ~5 kids rinsing hands<br>1 girl drinks 4A treated water<br>1 girl and 1 boy drink 4B treated water                                                                                        |
| 0949                                                            | 1 boy drinks 4B treated water, 3 cups<br>1 boy drinks 4B treated water, 2 cups                                                                                                            |
| 0950                                                            | 1 girl and 1 boy drink 4A treated water                                                                                                                                                   |
| 0951                                                            | 5 boys and 1 girl drink 4B treated water<br>4 boys drink 4A treated water                                                                                                                 |
| 0953                                                            | 1 boy drinks 4B treated water<br>Long line of 15+ students waiting to rinse hands                                                                                                         |
| 0954                                                            | 1 girl rinses hands at bowl on stand outside 4A                                                                                                                                           |
| 0956                                                            | 1 girl drinks 4A treated water 3 cups<br>1 girl drinks 4A treated water, 1 cup<br>~3 to 5 other girls drink 4A treated water<br>1 boy pours remainder of water in cup over hand into bowl |
| 0959                                                            | 1 girl drinks 4B treated water                                                                                                                                                            |
| 1000                                                            | 1 girl drinks 4A treated water, bell rings<br>3 girls and 3 boys drink 4A treated water<br>2 boys and 1 girl drink 4B treated water                                                       |
| 1005                                                            | 1 girl drinks 4A untreated water<br>1 boy rinses hands                                                                                                                                    |
| 1054                                                            | 2 girls rinse hands<br>1 girl drinks 4A treated water                                                                                                                                     |
| 1120                                                            | 1 boy and 1 girl drink 4A treated water<br>2 boys rinse hands then return to class                                                                                                        |
| 1130                                                            | 1 boy rinses hands, returns to 4B                                                                                                                                                         |
| 1155                                                            | 1 girl drinks 1 cup treated 4A water                                                                                                                                                      |
| 1201                                                            | 1 boy rinses hands                                                                                                                                                                        |
| 1202                                                            | 1 boy drinks 4B treated water 2 cups                                                                                                                                                      |

|      |                                                                               |
|------|-------------------------------------------------------------------------------|
| 1221 | 1 girl rinsing hands then drink 1 cup treated 4A water<br>1 girl rinses hands |
| 1227 | 1 boy leaves 4A for latrine                                                   |
| 1234 | Boy returns and rinses hands under MD (MadiDrop) bucket                       |
| 1246 | 1 boy drinks from MD bucket                                                   |
| 1247 | 1 boy runs to latrine                                                         |
| 1248 | Boy returns and washes his hands under spigot, then drinks from MD bucket     |
| 1255 | 1 boy runs to latrines                                                        |
| 1300 | Leave                                                                         |

| 4 <sup>th</sup> Grade Observations: Thursday August 6, 2015 (T3) |                                                                                                                                                                    |
|------------------------------------------------------------------|--------------------------------------------------------------------------------------------------------------------------------------------------------------------|
| 0929                                                             | Arrive. 4B has bucket inside doorway because cold day                                                                                                              |
| 0931                                                             | 4A tacher and class leave. 4b too.                                                                                                                                 |
| 0933                                                             | 4B BUCKET NOW OUTSIDE. KIDS RINISING HANDS                                                                                                                         |
| 0937                                                             | HAND RINSING JUG ALMOST EMPTY. BOYS TAKE IT TO REFILL AT CENTER TAP                                                                                                |
| 0940                                                             | 1 GIRL DRINKS 4B TREATED WATER. BOYS CARRY JUG BACK, POUR OUT BOTTOM WASTE WATER INTO PLANTS. STUDENTS RINSE HANDS.                                                |
| 0943                                                             | 1 BOY RINSES TUPPERWARE AT WATER BOWL ON STAND                                                                                                                     |
| 0946                                                             | LARGE CROWD GATHERS AROUND 1 WOMAN (TEACHER?)                                                                                                                      |
| 0950                                                             | KIDS SHARING SNACKS OUTSIDE 4A. CONTINUEOUS STREAM OF KIDS RINSING HANDS                                                                                           |
| 0953                                                             | 1 GIRL DRINKS 1 CUP TREATED 4A WATER<br>SHE POURS 1 CUP OVER FRIEND'S HANDS/STANDING BOWL                                                                          |
| 0954                                                             | 1 BOY DRINKS 1 CUP TREATED 4A WATER                                                                                                                                |
| 0958                                                             | ~10 KIDS RINSING HANDS                                                                                                                                             |
| 0959                                                             | 1 GIRL DRINKS 4A TREATED WATER 1 CUP + 1 BOY                                                                                                                       |
| 1000                                                             | BELL RINGS. 1 GIRL DRINKS 4A TREATED WATER + 2 BOYS + 1 BOY + 1 BOY<br>1 BOY RINSES HANDS IN STANDING BOWL<br>1 BOY POURS 2 CUPS TREATE WATER OVER HANDS INTO BOWL |
| 1002                                                             | 3 BOYS DRINK MD WATER 1-3 CUPS EACH<br>HAND RINSE JUG ALMOST EMPTY AGAIN                                                                                           |
| 1004                                                             | 2 BOYS COME TO DRINK MD WATER. GIRLS REFILL JUG FOR HAND RINSE.                                                                                                    |
| 1007                                                             | 4A/4B SWITCH CLASSROOMS. NO ONE DRINKS WATER<br>2 GIRLS RINSE HANDS THEN RETURN TO 4B                                                                              |
| 1015                                                             | SAMPLES COLLECTED                                                                                                                                                  |
| 1103                                                             | 4B BOY THROWS OUT EMPTY MILK BOX                                                                                                                                   |
| 1105                                                             | 4B BOY RINSES HANDS. WASTE WATER BUCKET VERY FULL                                                                                                                  |
| 1115                                                             | 1 BOY DRINKS 1 CUP 4A MD WATER, TOSSES OUT THE REST                                                                                                                |
| 1117                                                             | 3 BOYS DRINK 1 CUP EACH MD WATER 4A                                                                                                                                |
| 1124                                                             | 1 BOY PLACES CUP ON WATER BUCKET 4A<br>2 BOYS DRINK 1 CUP 4A MD WATER, 1 OF THEM TAKES ALL CUPS                                                                    |

|      |                                                                                                                                                                                 |
|------|---------------------------------------------------------------------------------------------------------------------------------------------------------------------------------|
|      | INSIDE                                                                                                                                                                          |
| 1125 | 1 GIRLS TAKES 1 CUP 4A MD WATER TO RINSE CUP THEN 1 CUP UNTREATED WATER TO RINSE HANDS THEN DRINK 1 CUP 4A MD WATER                                                             |
| 1127 | 1 BOY DRINKS 2 CUPS 4A MD WATER, TAKES CUPS INSIDE                                                                                                                              |
| 1129 | 1 BOY RINSES HANDS THEN RETURNS TO CLASS + 2 BOYS + 1 BOY                                                                                                                       |
| 1130 | 1 BOY DRINKS 4A MD WATER 1 CUP<br>1 BOY + 1 GIRL RINSE HANDS THEN GO TO CLASS                                                                                                   |
| 1131 | 1 GIRL DRINKS 4B MD WATER 2 CUPS<br>1 GIRL DRINKS 4A MD WATER 1 CUP<br>BOY AND GIRL PLAYING WITH CUP AND WATER                                                                  |
| 1135 | 4A TEACHER ENTERS 4B. PREVIOUSLY CLASS WAS CRAZY. NO 4B TEACHER? 4B STUDENTS ALL JOIN 4A CLASSROOM                                                                              |
| 1145 | WOMEN COLLECT TRASH FROM GROUND AND PLANT BED                                                                                                                                   |
| 1202 | BOY RETURNS TO CLASS                                                                                                                                                            |
| 1218 | BOY RINSES HANDS THEN RETURNS TO CLASS                                                                                                                                          |
| 1220 | GIRL AND BOY RINSE HANDS THEN RETURN TO CLASS                                                                                                                                   |
| 1304 | NO 4 <sup>TH</sup> GRADE TEACHER IN CLASSROOM                                                                                                                                   |
| 1309 | BOY DRINKS 2 CUPS MD WATER                                                                                                                                                      |
| 1315 | 4A TEACHER RETURNS TO CLASSROOM<br>4 <sup>TH</sup> GRADERS LEAVE                                                                                                                |
| 1320 | SOME STUDENTS SWEEPING ROMS                                                                                                                                                     |
| 1321 | GIRL TAKES 1 CUP 4A MD WATER TO HER FRIEND TO DRINK<br>SHE DRINKS 1 CUP HERSELF TOO                                                                                             |
| 1327 | 1 GIRL 4B DRINKS 1 CUP WATER (NOT SURE WHICH TYPE)<br>1 GIRL DRINK 1 CUP 4B MD WATER<br>AND 1 GIRL AND 1 GIRL<br>1 GIRL DRINKS 1 CUP 4A MD WATER                                |
| 1330 | BELL RINGS                                                                                                                                                                      |
| 1332 | 2 BOYS DRINK 4A MD WATER 1 CUP EACH AND ONE BOY AND ONE BOY DRINKS CUPS<br>1 BOY DRINK 1 CUP UNTREATED WATER 4A AND 1 CUP MD WATER<br>1 GIRL DRINKS 4B MD WATER AND 1 MORE GIRL |
| 1334 | PLACES MD BUCKET INSIDE 4A                                                                                                                                                      |

| 4 <sup>th</sup> Grade Observations: Friday August 7, 2015 (T3) |                                                                                                                                      |
|----------------------------------------------------------------|--------------------------------------------------------------------------------------------------------------------------------------|
| 915                                                            | Arrival. No teachers in both 4 <sup>th</sup> Grade classes                                                                           |
| 0925                                                           | 2 boys go to the bathroom, one washes his hands and the other doesn't<br>Female goes to the bathroom and comes back to was her hands |
| 0926                                                           | Grade 4B teacher comes back to the class                                                                                             |
| 0927                                                           | Female drinks MD water                                                                                                               |
| 0929                                                           | 2 (M) drink water in 4A MD<br>2 female go to latrine and come back to wash their hands                                               |
| 0930                                                           | 1 male goes to the bathroom and comes back to wash their hands                                                                       |

|      |                                                                                                       |
|------|-------------------------------------------------------------------------------------------------------|
| 0932 | Siren rings<br>1 male drinks MD water<br>Both 4 <sup>th</sup> grade classes go out to was their hands |
| 0935 | 1 female drinks MD water<br>1 female drinks MD water<br>3 male drink MD water                         |
| 0940 | 3 female drink md water                                                                               |
| 0943 | 2 female drink MD water                                                                               |
| 0945 | 2 female wash hands<br>1 female drinks MD water x2 cups                                               |
| 0948 | 3 female wash hands and empty the bucket with dirty water into the tree in front of their classroom   |
| 0950 | 3 males wash hands                                                                                    |
| 0952 | 4 male wash hands<br>3 female wash hands                                                              |
| 0955 | 4 male and 3 female wash hands<br>1 female drinks MD water                                            |
| 1000 | Siren rings<br>1 male drinks MD and 3 more drink MD water                                             |
| 1005 | Students go back to class                                                                             |
| 1006 | 1 female drinks MD water<br>2 males drink MD water                                                    |

---

## 7<sup>th</sup> Grade Observations

| 7 <sup>th</sup> Grade Observations: Wednesday July 22, 2015 (T1) |                                                                                                                                                                                                                                                                                    |
|------------------------------------------------------------------|------------------------------------------------------------------------------------------------------------------------------------------------------------------------------------------------------------------------------------------------------------------------------------|
| 0735                                                             | Filled jug by pouring from black bucket<br>Teacher adds ½ cup of sunlight dish soap to the jug<br><b>Set Up:</b><br><b>-one black bucket, one red bucket, one jug with spigot, one metal pan for each grade</b><br><b>-Jug is for handwashing; black bucket for drinking water</b> |
| 0740                                                             | 7B teacher comes to greet us                                                                                                                                                                                                                                                       |
| 0748                                                             | Woman delivers stack of metal plates on the floor outside the classrooms                                                                                                                                                                                                           |
| 0801                                                             | Student rings bell outside 7 <sup>th</sup> grade classrooms<br>3 students move from 7A to 7B                                                                                                                                                                                       |
| 0804                                                             | Woman removes plates into 6 <sup>th</sup> grade classroom                                                                                                                                                                                                                          |
| 0806                                                             | Teachers witch classrooms                                                                                                                                                                                                                                                          |
| 0807                                                             | 7A/B teachers move to 6 <sup>th</sup> grade classroom-many plates moved in and out                                                                                                                                                                                                 |
| 0808                                                             | Two stacks of plates dropped off in 7A and 7B                                                                                                                                                                                                                                      |

|      |                                                                                                                                                                                                                                                                                                                                                                                                                                 |
|------|---------------------------------------------------------------------------------------------------------------------------------------------------------------------------------------------------------------------------------------------------------------------------------------------------------------------------------------------------------------------------------------------------------------------------------|
| 0811 | Woman scoops water from the black bucket into the jug using a mug<br>She fills the plastic jug completely<br>Moves the black bucket to the middle of the classrooms and places mug on top                                                                                                                                                                                                                                       |
| 0815 | New black bucket brought for 6 <sup>th</sup> grade                                                                                                                                                                                                                                                                                                                                                                              |
| 0821 | Woman washing buckets and metal pans at center borehole spigot                                                                                                                                                                                                                                                                                                                                                                  |
| 0830 | Bell is rung                                                                                                                                                                                                                                                                                                                                                                                                                    |
| 0837 | (F) returns from latrines and uses spigot to wash hands before entering 7A                                                                                                                                                                                                                                                                                                                                                      |
| 0839 | 7B student drinks from black bucket using communal mug-gets water by dipping                                                                                                                                                                                                                                                                                                                                                    |
| 0840 | (M) student returns from latrines and washes hands under spigot for ~5 sec                                                                                                                                                                                                                                                                                                                                                      |
| 0847 | Woman drops off blue food box in room 7A                                                                                                                                                                                                                                                                                                                                                                                        |
| 0900 | Bell is rung                                                                                                                                                                                                                                                                                                                                                                                                                    |
| 0910 | (F) 7B student washes hands using spigot                                                                                                                                                                                                                                                                                                                                                                                        |
| 0911 | 2 more (F) 7B students leave classroom to wash hands under spigot                                                                                                                                                                                                                                                                                                                                                               |
| 0913 | 7B student drinks from communal mug                                                                                                                                                                                                                                                                                                                                                                                             |
| 0914 | (M) student leaves 7A to run for latrines                                                                                                                                                                                                                                                                                                                                                                                       |
| 0916 | Student returns and washes his hands under the spigot                                                                                                                                                                                                                                                                                                                                                                           |
| 0922 | (M) runs for bathroom                                                                                                                                                                                                                                                                                                                                                                                                           |
| 0927 | (F) leaves for restroom                                                                                                                                                                                                                                                                                                                                                                                                         |
| 0930 | She returns and washes her hands under the spigot                                                                                                                                                                                                                                                                                                                                                                               |
| 0930 | SNACK TIME<br>Whole school lining up at heir respective spigots to wash their hands (~10 sec/person)<br>Use waste water from washing to water the plants<br>Most of the jug is emptied for this handwashing process<br>*kids seem very excited to wash hands this way, and they are inexperienced with the spigots<br>*students need to be reminded to dump out the extra water in the bushes<br>*perhaps this is a new system? |
| 0943 | 7 <sup>th</sup> grade spigot runs out of water<br>As an alternative, the students use cups of water from the black bucket to pour onto their hands                                                                                                                                                                                                                                                                              |
| 0945 | 7 <sup>th</sup> grade spigot jug is refilled (I did not see refilling location)                                                                                                                                                                                                                                                                                                                                                 |
| 0949 | Handwashing finally ends at 7 <sup>th</sup> grade spigot                                                                                                                                                                                                                                                                                                                                                                        |
| 0951 | (F) washes hands; touches pottom of spigot to slow flow while she closes the spigot                                                                                                                                                                                                                                                                                                                                             |
| 0952 | (F) drinks water by dunking communal mug into bucket                                                                                                                                                                                                                                                                                                                                                                            |
| 0955 | 2 students drink-communal mug<br>5 students wash hands post-snack                                                                                                                                                                                                                                                                                                                                                               |
| 0956 | 3 students drink-communal mug                                                                                                                                                                                                                                                                                                                                                                                                   |
| 0958 | 3 students drink-communal mug                                                                                                                                                                                                                                                                                                                                                                                                   |

|      |                                                                                                                        |
|------|------------------------------------------------------------------------------------------------------------------------|
|      | 2 students wash hands-spigot<br>groups of girls playing hand-slapping games                                            |
| 1000 | "saw" noise signals end of snack time                                                                                  |
| 1001 | 2 students wash hands-spigot                                                                                           |
| 1030 | Bell is rung                                                                                                           |
| 1053 | (M) student drinks-communal mug                                                                                        |
| 1100 | Bell is rung                                                                                                           |
| 1101 | (M) student drinks-communal mug                                                                                        |
| 1130 | Bell is rung                                                                                                           |
| 1136 | (M) 7A student runs to bathroom                                                                                        |
| 1141 | (F) 7A student drinks water-communal mug                                                                               |
| 1142 | Student returns from bathroom and rinses hands from spigot                                                             |
| 1145 | Younger student washes hands at 7 <sup>th</sup> grade spigot-touches sides and bottom of spigot when trying to open it |
| 1153 | (M) 7A student drinks-communal mug                                                                                     |
| 1200 | 2 students come out to wash their hands<br>bell is rung                                                                |
| 1202 | bell ringer drinks-communal mug                                                                                        |
| 1204 | 2 students drink-communal mug                                                                                          |
| 1212 | 2 7B (F) students come out to wash hands                                                                               |
| 1230 | Bell is rung                                                                                                           |

| <b>7<sup>th</sup> Grade Observations: Thursday July 23, 2015 (T1)</b> |                                                                                             |
|-----------------------------------------------------------------------|---------------------------------------------------------------------------------------------|
| 1000                                                                  | Students go back into classrooms after snack break<br>Bring back refilled jug (from where?) |
| 1035                                                                  | (M) student dumps out pan and bucket                                                        |
| 1135                                                                  | (M) runs to restroom                                                                        |
| 1139                                                                  | (M) drinks-communal mug<br>2 (F) run to restroom                                            |
| 1142                                                                  | (F) returns and washes hands under spigot<br>(M) returns and washes hands under spigot      |
| 1145                                                                  | Second girl returns and washes hands under spigot                                           |
| 1147                                                                  | 2 girls wash hands under spigot                                                             |
| 1204                                                                  | 6 <sup>th</sup> grade water bucket refilled at central borehole                             |
| 1211                                                                  | (M) leaves for restroom                                                                     |
| 1216                                                                  | (M) returns and washes hands under spigot<br>(F) leaves for restroom                        |
| 1219                                                                  | (F) returns and washes hands under spigot                                                   |
| 1228                                                                  | (M) leaves for restroom/another room?                                                       |
| 1302                                                                  | Students switch classrooms                                                                  |
| 1303                                                                  | (F) drinks with communal mug 4 times                                                        |
| 1308                                                                  | 7 <sup>th</sup> grade teachers meet with Natasha and Mulalo                                 |
| 1330                                                                  | School's out                                                                                |
| 1336                                                                  | Waste water dumped into plants                                                              |

| <b>7<sup>th</sup> Grade Observations: Monday July 27, 2015 (T1)</b> |                                                                                                                                                       |
|---------------------------------------------------------------------|-------------------------------------------------------------------------------------------------------------------------------------------------------|
| 1005                                                                | Refill handwashing jug                                                                                                                                |
| 1024                                                                | Two girls run out of 7B talking on phone                                                                                                              |
| 1031                                                                | (F) exits 7A                                                                                                                                          |
| 1033                                                                | (F) returns with new book                                                                                                                             |
| 1034                                                                | 7A to computer lab                                                                                                                                    |
| 1149                                                                | (M) leaves 7B for latrine                                                                                                                             |
| 1152                                                                | (F) leaves for latrine<br>(M) returns without washing hands<br>(F) leaves for latrine                                                                 |
| 1154                                                                | Maid walks past classrooms<br>Maid returns and takes black water bucket from classroom to spigot<br>Uses spigot by central borehole                   |
| 1156                                                                | David speaks with Principal and teacher/administrator<br>Maid returns black water bucket<br>Places water bucket outside between 7A/7B with mug on lid |
| 1158                                                                | Teacher/admin explains that they put the buckets inside classrooms on cold days                                                                       |
| 1200                                                                | Bell is rung                                                                                                                                          |
| 1207                                                                | Principal and 4B teacher discuss outside 7A classroom<br>Principal enters 7A                                                                          |
| 1226                                                                | (F) returns with pencil pouch                                                                                                                         |
| 1227                                                                | (F) leaves 7A for latrine                                                                                                                             |
| 1230                                                                | 2 (F) return from latrine<br>both drink 2-3 cups of water but do not rinse hands                                                                      |
| 1232                                                                | (F) leaves 7B for latrine                                                                                                                             |
| 1234                                                                | (F) returns from latrine and rinses hands at jug                                                                                                      |
| 1251                                                                | (M) enters 7A classroom<br>teacher looks in through 7A's window<br>(M) leaves 7A                                                                      |
| 1252                                                                | 7B class returns to room<br>2 (F) drink 2-4 cups of water<br>(M) drinks 1 cup<br>(F) drinks 1 cup<br>they all return to 7B                            |
| 1254                                                                | (M) returns to 7B<br>(M) rinses hands then returns to 7A<br>teacher enters 7B                                                                         |
| 1256                                                                | 2 students speak with teacher outside 7B<br>teacher remains outside 7B                                                                                |
| 1258                                                                | Adults walk in and out of 7B                                                                                                                          |
| 1300                                                                | Bell is rung                                                                                                                                          |
| 1303                                                                | (M) exits 7A for latrine                                                                                                                              |
| 1304                                                                | (M) enters 7A                                                                                                                                         |



|      |                                                                                                                                                                                                                 |
|------|-----------------------------------------------------------------------------------------------------------------------------------------------------------------------------------------------------------------|
| 1308 | 2 (F) leave 7A<br>(M) enters 7B then walks to 7A                                                                                                                                                                |
| 1311 | 3 (F) return to 7A, do not wash hands                                                                                                                                                                           |
| 1315 | (M) leaves 7B, immediately returns                                                                                                                                                                              |
| 1316 | teacher speaks with 7B teacher outside<br>2 teachers also stand outside 7A                                                                                                                                      |
| 1319 | 2 (M) making mischief outside 7B                                                                                                                                                                                |
| 1322 | 2 (M) leave 7A                                                                                                                                                                                                  |
| 1323 | (M) walks to 7B from 7A<br>students from other classrooms gradually walking into courtyard                                                                                                                      |
| 1325 | (M) walks to 7A from 7B<br>(F) enters 7A                                                                                                                                                                        |
| 1327 | (M) walks into 7A                                                                                                                                                                                               |
| 1329 | (M) rinses hands                                                                                                                                                                                                |
| 1330 | 2 (F) leave 7B<br>bell rings<br>other classrooms emptying, grade 7 slightly slower<br>(M) fills cup but does not drink                                                                                          |
| 1334 | Students still standing outside<br>(F) pours full water cup onto sidewalk, then she fills and drinks a mug from the bucket                                                                                      |
| 1336 | (F) drinks 1 cup<br>(M) drinks 2 cups<br>(F) drinks 2 cups<br>(F) drinks 1 cup, pours out remainder on the ground<br>fight occurring outside 7A<br>student sweeping trash from classroom into box off the steps |
| 1340 | Students take dust box behind classroom<br>Students start to leave classroom/school premises                                                                                                                    |
| 1344 | Students close gate over doors<br>Only 3 (M) still stand outside 7A/B                                                                                                                                           |
| 1345 | All 7 <sup>th</sup> grade students are gone                                                                                                                                                                     |

| <b>7<sup>th</sup> Grade Observations: Tuesday July 28, 2015 (T2)</b> |                                                                                                             |
|----------------------------------------------------------------------|-------------------------------------------------------------------------------------------------------------|
| 800                                                                  | Bell is rung<br>Two MadiDrop buckets are out in from of the classrooms, next to usual drinking water bucket |
| 814                                                                  | Principal comes to talk to 7A teacher, 7A teacher comes outside                                             |
| 830                                                                  | 7A teacher returns to classroom<br>7A and 7B students switch classrooms                                     |
| 833                                                                  | (F) drinks from communal mug/regular black bucket                                                           |
| 834                                                                  | 7A teacher exits classroom                                                                                  |
| 849                                                                  | 2 (M) students exit 7B                                                                                      |
| 852                                                                  | 2 (M) students return to 7B                                                                                 |
| 857                                                                  | Food bins are delivered                                                                                     |

|      |                                                                                                                                                                                                                    |
|------|--------------------------------------------------------------------------------------------------------------------------------------------------------------------------------------------------------------------|
| 900  | Bell is rung<br>(M) student returns from latrines, does not wash hands                                                                                                                                             |
| 901  | Plates delivered for snacks                                                                                                                                                                                        |
| 910  | 7B (F) leaves class                                                                                                                                                                                                |
| 915  | 7A (F) leaves class and is turned back by the teacher<br>7B teacher entered<br>(M) left class, came back with a box of books                                                                                       |
| 916  | 7A (F) pours liquid soap in the jerrycan                                                                                                                                                                           |
| 917  | (F) washes hands                                                                                                                                                                                                   |
| 920  | One of the cooks fills up the jerrycan with water from the bucket using a cup                                                                                                                                      |
| 930  | SNACK TIME!<br>Students line up to wash their hands, call other students out of the class; some drink water from the MD bucket using the spigot                                                                    |
| 938  | (M) takes big box of books back to the admin building                                                                                                                                                              |
| 942  | 2 (F) rinse hands                                                                                                                                                                                                  |
| 950  | Jerrycan is refilled with water                                                                                                                                                                                    |
| 955  | (M) empties the used water bucket<br>(M) washes hands<br>(F) washes hands                                                                                                                                          |
| 958  | Cook takes the food serving containers back to the kitchen                                                                                                                                                         |
| 1000 | Bell rings, Students rush back to class                                                                                                                                                                            |
| 1005 | Collected the water samples from MadiDrop buckets                                                                                                                                                                  |
| 1015 | Water testing for pH/chlorine                                                                                                                                                                                      |
| 1025 | Teacher enters 7A                                                                                                                                                                                                  |
| 1030 | Bell rings                                                                                                                                                                                                         |
| 1040 | Principal visits 7A                                                                                                                                                                                                |
| 1100 | Bell rings                                                                                                                                                                                                         |
| 1103 | (F) drinks 2 cups from the MadiDrop bucket<br>(F) drinks from the MadiDrop bucket                                                                                                                                  |
| 1105 | 2 (F) go to the bathroom                                                                                                                                                                                           |
| 1111 | Teacher left to 7B and then to the admin building and comes back<br>(F) goes to bathroom<br>(F) goes 7A to 7B<br>(F) goes 7B to 7A                                                                                 |
| 1114 | The 2 girls come back from the bathroom and wash their hands<br>(M) drinks water from the MadiDrop bucket – 2 cups<br>(M) drinks water from the MD bucket<br>(M) goes to bathroom and comes back to wash his hands |
| 1115 | 7B goes to 7A<br>5 (M) drink water<br>(F) drinks water                                                                                                                                                             |
| 1130 | Bell rings, (M) drinks water from MD bucket                                                                                                                                                                        |
| 1200 | Bell rings                                                                                                                                                                                                         |
| 1205 | 6 (F) drink water from MD bucket                                                                                                                                                                                   |

|      |                                                                                                                                                                                             |
|------|---------------------------------------------------------------------------------------------------------------------------------------------------------------------------------------------|
|      | 4 (M) drink water from MD bucket                                                                                                                                                            |
| 1215 | (M) drinks water from MD bucket                                                                                                                                                             |
| 1218 | (F) leave to go to the bathroom (barefoot), back at 1240 and washes hands<br>2 (F) come back to the classroom and do not wash hands<br>1 (F) comes back and washes hands; then drinks water |
| 1220 | (M) comes back from bathroom and does not wash hands<br>students move from 7A to 7B<br>5 (F) drink water<br>3 (M) drink water                                                               |
| 1225 | Students move from 7B to 7A-combined again                                                                                                                                                  |
| 1230 | Bell rings                                                                                                                                                                                  |
| 1300 | Bell rings                                                                                                                                                                                  |
| 1312 | Buckets with MDs emptied and refilled for tomorrow                                                                                                                                          |
| 1330 | School day over                                                                                                                                                                             |

| 7 <sup>th</sup> Grade Observations: Wednesday July 29, 2015 (T2) |                                                                                                                                                          |
|------------------------------------------------------------------|----------------------------------------------------------------------------------------------------------------------------------------------------------|
| 932                                                              | (M) drinks from MD bucket with communal mug                                                                                                              |
| 934                                                              | (F) pours cup of dish soap into handwashing jug and shakes it up                                                                                         |
| 936                                                              | (F) drinks-MD bucket                                                                                                                                     |
| 937                                                              | (M) drinks-MD bucket                                                                                                                                     |
| 938                                                              | ~10 kids washing hands under spigot                                                                                                                      |
| 939                                                              | (M) drinks-MD bucket                                                                                                                                     |
| 941                                                              | (M) drinks-MD bucket                                                                                                                                     |
| 942                                                              | (M) drinks-MD bucket<br>(M) drinks-MD bucket                                                                                                             |
| 943                                                              | 5 (M) drink-MD bucket                                                                                                                                    |
| 944                                                              | 3 (F) drink-MD bucket                                                                                                                                    |
| 945                                                              | ~10 kids washing hands under spigot<br>(M) drinks-MD bucket                                                                                              |
| 946                                                              | (F) drinks-MD bucket                                                                                                                                     |
| 947                                                              | (M) drinks-black bucket                                                                                                                                  |
| 950                                                              | 2 (M) wash hands<br>(F) drinks-MD bucket<br>(M) drinks-black bucket                                                                                      |
| 951                                                              | 3 (F) drink-MD bucket                                                                                                                                    |
| 953                                                              | (M) drinks-MD bucket<br>little (M) drinks-MD bucket<br>big 7 <sup>th</sup> grade (F) steals cup from him and drinks-MD<br>(F) drinks-MD<br>(M) drinks-MD |
| 954                                                              | 2 (F) drink-MD                                                                                                                                           |
| 956                                                              | 2 (F) drink-MD<br>(M) drinks-MD<br>(F) drinks-MD                                                                                                         |

|      |                                                                                      |
|------|--------------------------------------------------------------------------------------|
| 958  | (F) drinks-MD                                                                        |
| 959  | 2 (F) drink-MD                                                                       |
| 1000 | (F) drinks-MD                                                                        |
| 1001 | 3 (F) drink-MD<br>(F) drinks-MD (but by dipping in!)<br>2 (M) drink-MD<br>bell rings |
| 1002 | (M) washes hand using spigot                                                         |
| 1004 | (F) little girl from another grade comes to steal a cup of MD water                  |
| 1030 | Bell rings                                                                           |
| 1035 | (F) uses water from MD bucket to wash cup, then she pours it out and drink MD water  |
| 1042 | (F) drinks-MD                                                                        |
| 1100 | Bell rings                                                                           |
| 1102 | (M) drinks-MD                                                                        |
| 1105 | (F) washes hands under spigot                                                        |
| 1130 | Bell rings                                                                           |
| 1200 | Bell rings                                                                           |
| 1201 | 2 (F) drink-MD<br>(M) drinks-MD                                                      |
| 1203 | 3(F) drink-MD<br>(M) drinks-MD                                                       |
| 1210 | (F) enters 7B<br>7B teacher enters                                                   |
| 1211 | Administrator talks with 7B teacher                                                  |
| 1212 | (F) drinks-MD                                                                        |
| 1220 | (M) student leaves to 6 <sup>th</sup> grade, returns soon after                      |
| 1222 | (M) student returns from latrine and rinses hands under spigot                       |
| 1233 | (F) takes a drink-MD                                                                 |
| 1238 | (F) and (M) exit classroom to go to latrine                                          |
| 1301 | Bell is rung                                                                         |
| 1305 | 7 <sup>th</sup> grade classes switch classrooms                                      |
| 1306 | (F) drinks-MD                                                                        |
| 1309 | (M) drinks-MD                                                                        |
| 1312 | (F) drinks-MD                                                                        |
| 1314 | (M) washes hands and then gets a drink-MD                                            |
| 1316 | Teacher washes hands and returns to 7A<br>Refill buckets for tomorrow                |

| <b>7<sup>th</sup> Grade Observations: Monday August 4th, 2015 (T3)</b> |                                                                   |
|------------------------------------------------------------------------|-------------------------------------------------------------------|
| 940                                                                    | Arrive at school during snack break<br>Normal buckets are removed |
| 941                                                                    | 2 (F) drink MD                                                    |
| 943                                                                    | 4 (F) drink MD                                                    |
| 943                                                                    | 4 (M) drink MD                                                    |

|      |                                                                                                                                |
|------|--------------------------------------------------------------------------------------------------------------------------------|
| 946  | 4 (M) wash hands                                                                                                               |
| 948  | 3 (F) drink MD                                                                                                                 |
| 950  | 1 (M) washes hands                                                                                                             |
| 955  | 2 (M) wash hands                                                                                                               |
| 1000 | 3 (F) wash hands<br>snack over                                                                                                 |
| 1030 | Bell rings                                                                                                                     |
| 1040 | 7A goes to computer lab                                                                                                        |
| 1100 | Bell                                                                                                                           |
| 1101 | 3 (M) and 3 (F) drink-MD using one cup                                                                                         |
| 1150 | 2 (m) leave class                                                                                                              |
| 1200 | 7A return to class from computer room, a few wash hands and a large group drinks-MD                                            |
| 1201 | 8 (F) line up to drink from MD using one cup                                                                                   |
| 1205 | 1 (F) drinks-MD<br>1 (M) drinks-MD                                                                                             |
| 1206 | 1 (M) drinks-MD                                                                                                                |
| 1223 | 1 (F) leaves class to go fetch water from the tap with a juice bottle                                                          |
| 1224 | 1 (F) drinks MD                                                                                                                |
| 1230 | 1 (M) drinks MD<br>bell rings then 1 (M) drinks MD                                                                             |
| 1232 | 2 (F) drink MD                                                                                                                 |
| 1233 | 1 (M) drinks MD                                                                                                                |
| 1235 | They refill 7B bucket                                                                                                          |
| 1237 | 1 (F) goes out of the classroom, comes back at 1240                                                                            |
| 1240 | 1 (M) goes to the admin block                                                                                                  |
| 1241 | 2 (F) leave class to go towards the admin block and two go to the latrine side                                                 |
| 1245 | 1 (M) leaves 7A to 7B, then goes back to 7A, then goes to the latrine with another boy, and finally both boys go back to class |
| 1247 | (M) from admin returns                                                                                                         |
| 1250 | 1 (m) goes to the latrine                                                                                                      |
| 1253 | 2 (F) come back from admin with lollipops                                                                                      |
| 1255 | 2 (F) come back from latrine and wash hands                                                                                    |
| 1256 | 1 (M) goes to latrine and does not wash hands                                                                                  |
| 1259 | 2 (F) go to latrine and come back and do not wash their hands                                                                  |
| 1300 | Bell rings                                                                                                                     |

| 7 <sup>th</sup> Grade Observations: Thursday August 6, 2015 (T3) |                                                                                                                                                                                                                                                                |
|------------------------------------------------------------------|----------------------------------------------------------------------------------------------------------------------------------------------------------------------------------------------------------------------------------------------------------------|
| 932                                                              | ~30 kids wash hands under spigot before returning to class for snack time<br><b>**both 7<sup>th</sup> grade buckets were not filled until this morning because the kids took them along to play soccer yesterday, and did not return them in the morning**</b> |
| 942                                                              | (F) washes hands                                                                                                                                                                                                                                               |

|      |                                                                                                            |
|------|------------------------------------------------------------------------------------------------------------|
| 943  | (F) and (M) exit class                                                                                     |
| 944  | 2 (M) wash hands<br>2 (F) wash hands                                                                       |
| 946  | (M) washes hands                                                                                           |
| 947  | A bunch of students run to the yard                                                                        |
| 948  | (M) washes hands                                                                                           |
| 949  | 4 (M) and 1 (F) wash hands                                                                                 |
| 951  | (M) washes hands                                                                                           |
| 1000 | End of SNACK                                                                                               |
| 1001 | 3 (F) and 2(M) wash hands                                                                                  |
| 1004 | 7A teacher leaves class                                                                                    |
| 1017 | <b>**I realize spigot is broken on 7A bucket and cannot be used anymore**</b>                              |
| 1022 | 2 girls return from latrine, only one washes hands                                                         |
| 1030 | Bell is rung                                                                                               |
| 1047 | (F) 7 <sup>th</sup> grade teacher walking around by main admin                                             |
| 1056 | Boy comes out to drink but realizes there is no cup outside and goes back to class                         |
| 1057 | (F) leaves to latrine                                                                                      |
| 1058 | (F) drinks two cups from black bucket (non-madidrop)<br>(F) drinks-black bucket<br>(M) drinks-black bucket |
| 1100 | Bell rung<br>(F) drinks-MD                                                                                 |
| 1112 | 2 (M) wash cups at borehole spigot and then drink from the borehole spigot                                 |
| 1113 | (M) drinks-borehole spigot                                                                                 |
| 1115 | (M) drinks-black bucket                                                                                    |
| 1118 | (M) returns from latrine and washes hands under the spigot                                                 |
| 1121 | (F) drinks-black bucket                                                                                    |
| 1125 | 2 (M) return from the bathroom and do not wash hands                                                       |
| 1126 | 2 (F) return from the bathroom and rinse hands                                                             |
| 1127 | (F) drinks from black bucket                                                                               |
| 1129 | 2 (F) wash hands<br>2 (F) drink from black bucket                                                          |
| 1130 | Bell rung                                                                                                  |
| 1134 | (M) drinks-black bucket                                                                                    |
| 1136 | (M) drinks 2 cups-black bucket                                                                             |
| 1200 | Bell is rung                                                                                               |
| 1203 | (M) drinks 2 cups-black bucket                                                                             |
| 1223 | (F) runs to latrine                                                                                        |
| 1230 | Bell                                                                                                       |
| 1233 | (F) leaves 7A                                                                                              |
| 1239 | (F) returns from main office                                                                               |
| 1258 | (F) drinks from black bucket                                                                               |

|      |                                                                 |
|------|-----------------------------------------------------------------|
| 1305 | (M) leaves 7B for restroom                                      |
| 1308 | (F) drinks 1 cups water (not sure which bucket)                 |
| 1309 | Allison switches broken bucket for a new one                    |
| 1315 | 2 (F) go to latrine                                             |
| 1317 | (M) drinks-MD                                                   |
| 1320 | A bunch of students sitting around outside                      |
| 1323 | Bucket under spigot is emptied into flowers<br>(M) washes hands |
| 1326 | (F) drinks from black bucket                                    |
| 1330 | End of day<br>(M) drinks from black bucket                      |

| <b>7<sup>th</sup> Grade Observations: Friday August 7, 2015 (T3)</b> |                                                                                                           |
|----------------------------------------------------------------------|-----------------------------------------------------------------------------------------------------------|
| 918                                                                  | Began observations, only one bucket outside<br>It appears almost all the 7 <sup>th</sup> graders are gone |
| 929                                                                  | (F) drinks-MD                                                                                             |
| 930                                                                  | Snacktime begins!                                                                                         |
| 939                                                                  | (F) drinks-MD                                                                                             |
| 951                                                                  | ~10 kids rinsing hands                                                                                    |
| 957                                                                  | 3 girls looking into MD water bucket                                                                      |
| 959                                                                  | Bell rings<br>(we leave early to attend luncheon at UNIVEN)                                               |
